# Supplementary material for: Redox double-switch cancer theranostics through Pt(iv) functionalised manganese dioxide nanostructures
Source: Royal Society of Chemistry journal article supplement (doi:10.1039/d3nr00076a), 2023-01-01
Supplement: d3nr00076a1.pdf [file d3nr00076a1.pdf]

**Title:** Redox double switch theranostics against cancer: Pt(IV) prodrug-functionalised MnO<sub>2</sub> nanostructures

**Authors:** Beatriz Brito,<sup>a,b,c</sup> Maria Rosaria Ruggiero,<sup>a</sup> Thomas W. Price,<sup>a</sup> Milene da Costa Silva,<sup>c</sup> Núria Genicio,<sup>c</sup> Annah J. Wilson,<sup>a</sup> Olga Tyurina,<sup>a</sup> Veronika Rosecker,<sup>a</sup> Thomas R. Eykyn,<sup>a</sup> Manuel Bañobre-López,<sup>c</sup> Graeme J. Stasiuk<sup>a</sup> and Juan Gallo<sup>c</sup>

**Affiliations:** <sup>a</sup>Department of Imaging Chemistry and Biology, School of Biomedical Engineering and Imaging Sciences, King's College London, Strand, WC2R 2LS London, UK [graeme.stasiuk@kcl.ac.uk](mailto:graeme.stasiuk@kcl.ac.uk)

<sup>b</sup>School of Life Sciences, Faculty of Health Sciences, University of Hull, Cottingham Road, HU6 7RX Hull, UK

<sup>c</sup>Advanced Magnetic Theranostic Nanostructures Lab, International Iberian Nanotechnology Laboratory, Av. Mestre José Veiga, 4715-330 Braga, [juan.gallo@inl.int](mailto:juan.gallo@inl.int), [manuel.banobre@inl.int](mailto:manuel.banobre@inl.int)

## Supporting Information

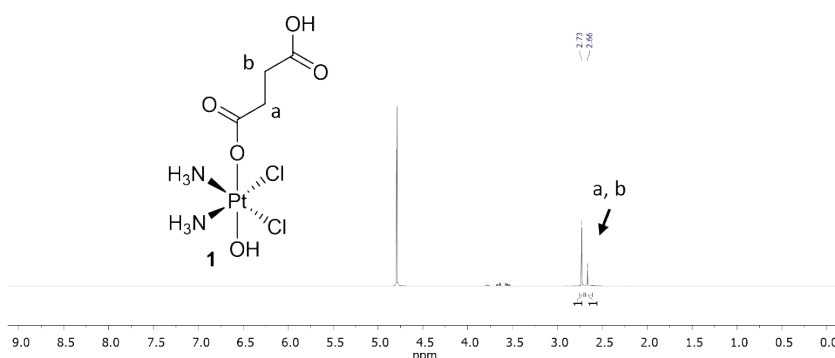

**Figure S1.** <sup>1</sup>H NMR of Pt(IV) complex **1**, in D<sub>2</sub>O, at 400 MHz.

**Table S1.** Optimisation of the preparation of MnO<sub>2</sub>-Pt NPs. Reaction conditions, hydrodynamic size (*D<sub>H</sub>*), surface charge ( $\zeta$ -Pot), and ICP measurements. Relaxivity measurements performed in the absence (native) and presence of ascorbic acid (10 mM, 1.5 T).

| Reaction | [KMnO <sub>4</sub> ] (mM) | Mn/Pt reaction | <i>D<sub>H</sub></i> (nm) | $\zeta$ -Pot (mV) | Mn/Pt ICP   | Native <i>r</i> <sub>1</sub> (mM <sup>-1</sup> .s <sup>-1</sup> ) | Redox <i>r</i> <sub>1</sub> (mM <sup>-1</sup> .s <sup>-1</sup> ) | Fold increase |     |
|----------|---------------------------|----------------|---------------------------|-------------------|-------------|-------------------------------------------------------------------|------------------------------------------------------------------|---------------|-----|
| A        | 9                         | 0.50           | 187 ± 54                  | -43.0 ± 1.5       | 0.5         | 0.046 ± 0.002                                                     | 0.343 ± 0.026                                                    | 7             |     |
| B        | 1.6                       | 2              | 198 ± 44                  | -46.3 ± 1.4       | 9.1         | 0.066 ± 0.007                                                     | 7.201 ± 0.351                                                    | 108           |     |
| C        |                           | 1              | 123 ± 38                  | -47.8 ± 1.3       | 8.3         | 0.078 ± 0.006                                                     | 6.147 ± 0.141                                                    | 79            |     |
| D        |                           | 0.70           | 160 ± 61                  | -52.4 ± 0.9       | 4.0         | 0.057 ± 0.001                                                     | 5.666 ± 0.134                                                    | 100           |     |
| E        |                           | 0.5            | 156 ± 37                  | -45.9 ± 0.9       | 4.0         | 0.104 ± 0.005                                                     | 6.236 ± 0.227                                                    | 60            |     |
| F        |                           | 0.25           |                           | 75 ± 21           | -53.2 ± 2.1 | 5.3                                                               | 0.035 ± 0.007                                                    | 4.698 ± 0.112 | 136 |
| G        |                           |                |                           | 145 ± 35          | -54.6 ± 1.9 | 4.5                                                               | 0.070 ± 0.002                                                    | 5.747 ± 0.077 | 82  |
| H        |                           |                |                           | 135 ± 35          | -26.2 ± 0.3 | 4.5                                                               | 0.067 ± 0.011                                                    | 7.258 ± 0.158 | 108 |
| I        |                           |                |                           | 140 ± 20          | -53.0 ± 0.4 | 2.8                                                               | 0.065 ± 0.003                                                    | 4.700 ± 0.008 | 72  |

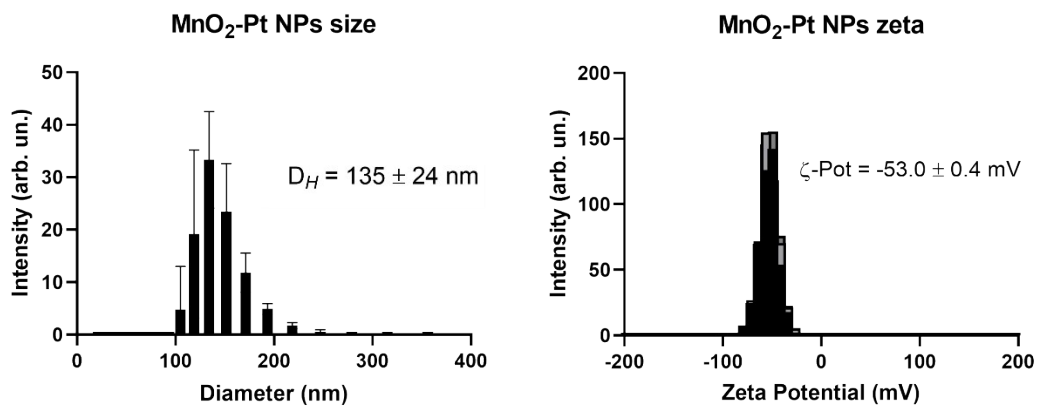

Figure S2. DLS and zeta measurements of MnO<sub>2</sub>-Pt(IV) NPs.

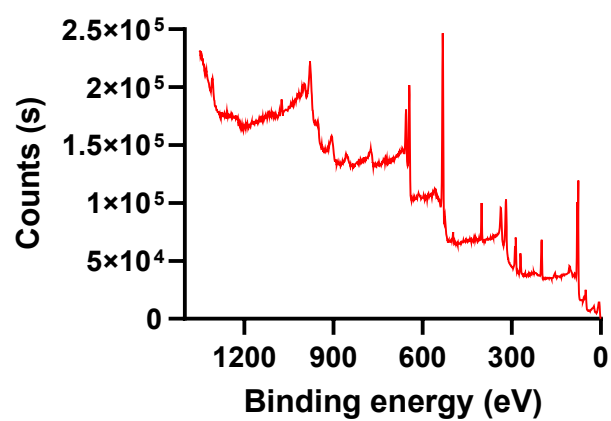

Figure S3. XPS spectra of MnO<sub>2</sub>-Pt(IV) NPs.

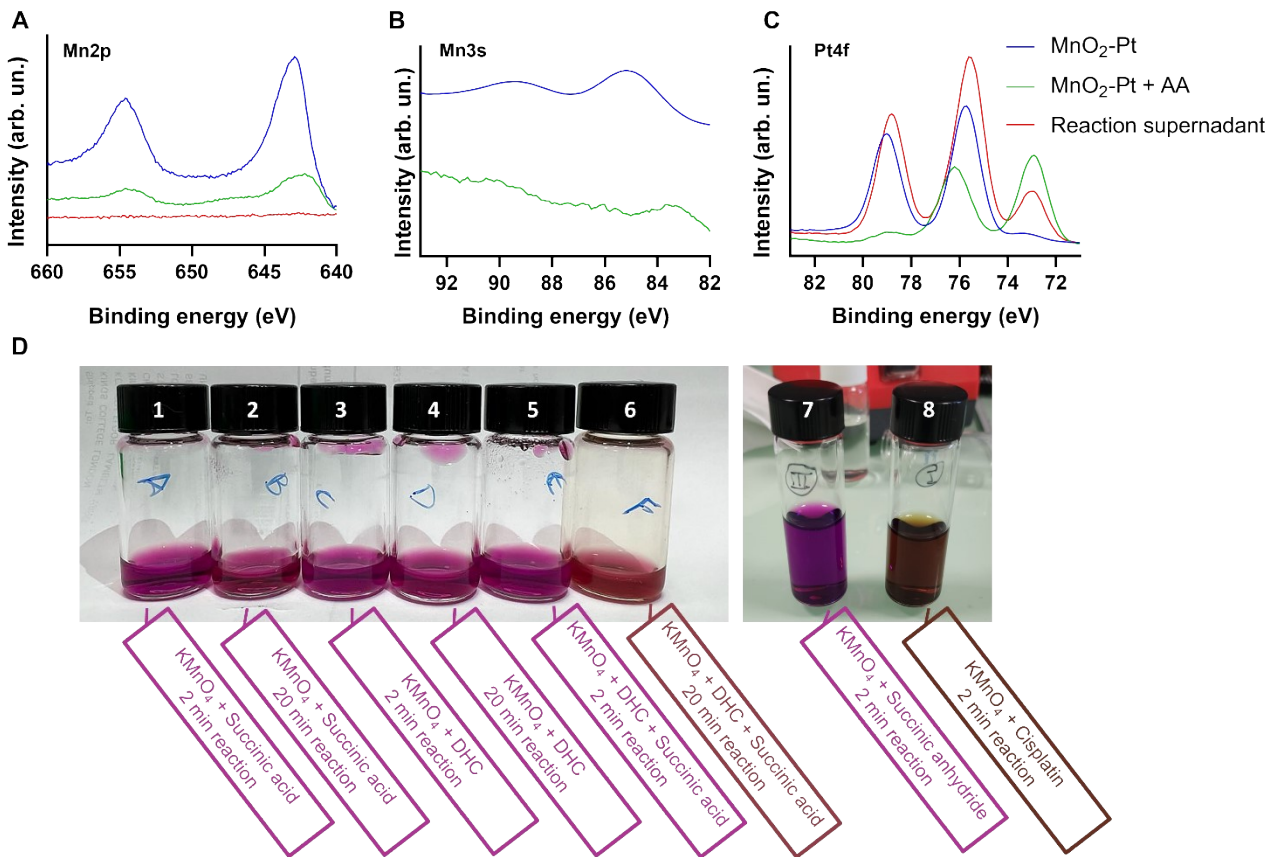

**Figure S4.** Expanded A) Mn2p, B) Mn3s and C) Pt4f regions of XPS spectra of  $\text{MnO}_2$ -Pt(IV) nanoparticles. Blue line:  $\text{MnO}_2$ -Pt(IV) NPs (pH = 7.4); green line:  $\text{MnO}_2$ -Pt(IV) NPs (pH = 7.4, 100  $\mu\text{M}$  AA); red line: reaction supernatant obtained during purification of  $\text{MnO}_2$ -Pt(IV) NPs (pH = 7.4). D) Control  $\text{KMnO}_4$  ultrasonication reactions with different ligands. Reaction mixtures that remained purple (1-5 and 7) show that Mn(VII) was not reduced, and nanoparticles were not formed. Reaction mixtures that turned brown after ultrasonication (6 and 8) indicate that the Mn(VII) in solution was reduced into nanoparticles.

#### Stability of $\text{MnO}_2$ -Pt(IV) NPs in PBS with 10% FBS

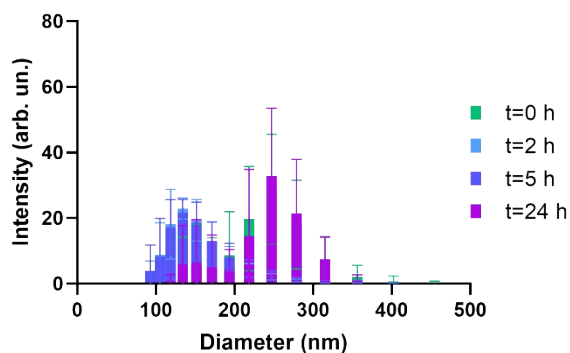

#### Stability of $\text{MnO}_2$ -Pt(IV) NPs in RPMI

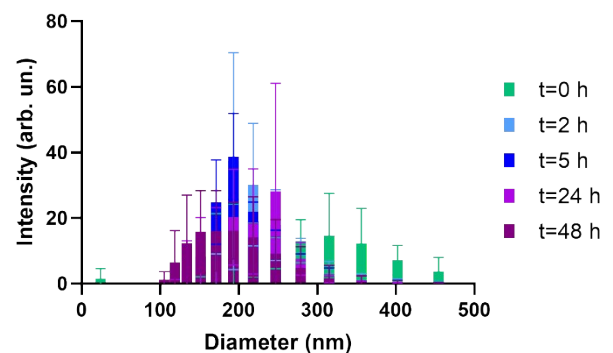

**Figure S5.** DLS measurements of  $\text{MnO}_2$ -Pt nanoparticles in PBS with 10% FBS (left) or RPMI with 10% FBS (right) at different time points.

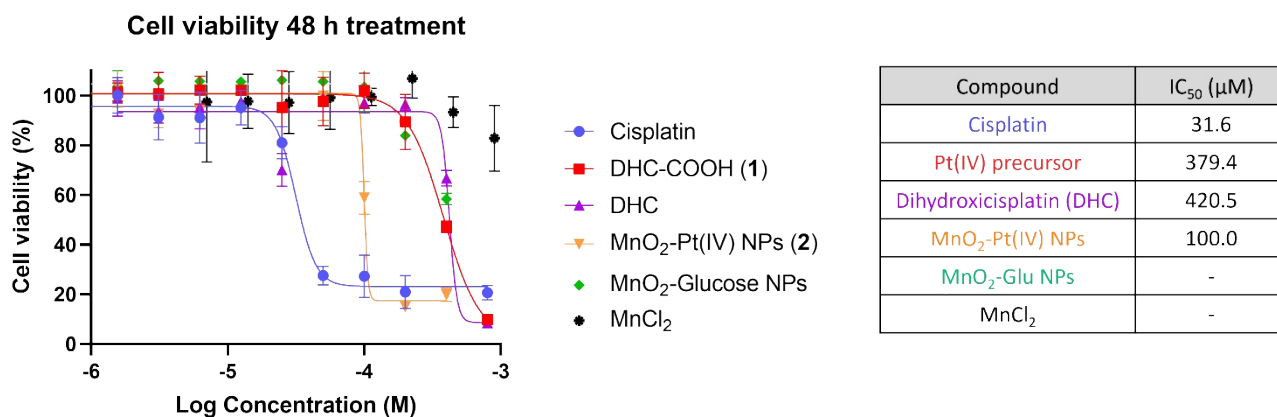

**Figure S6.** Cell viability study employing 2D model of A549 cells after 48 h of treatments.

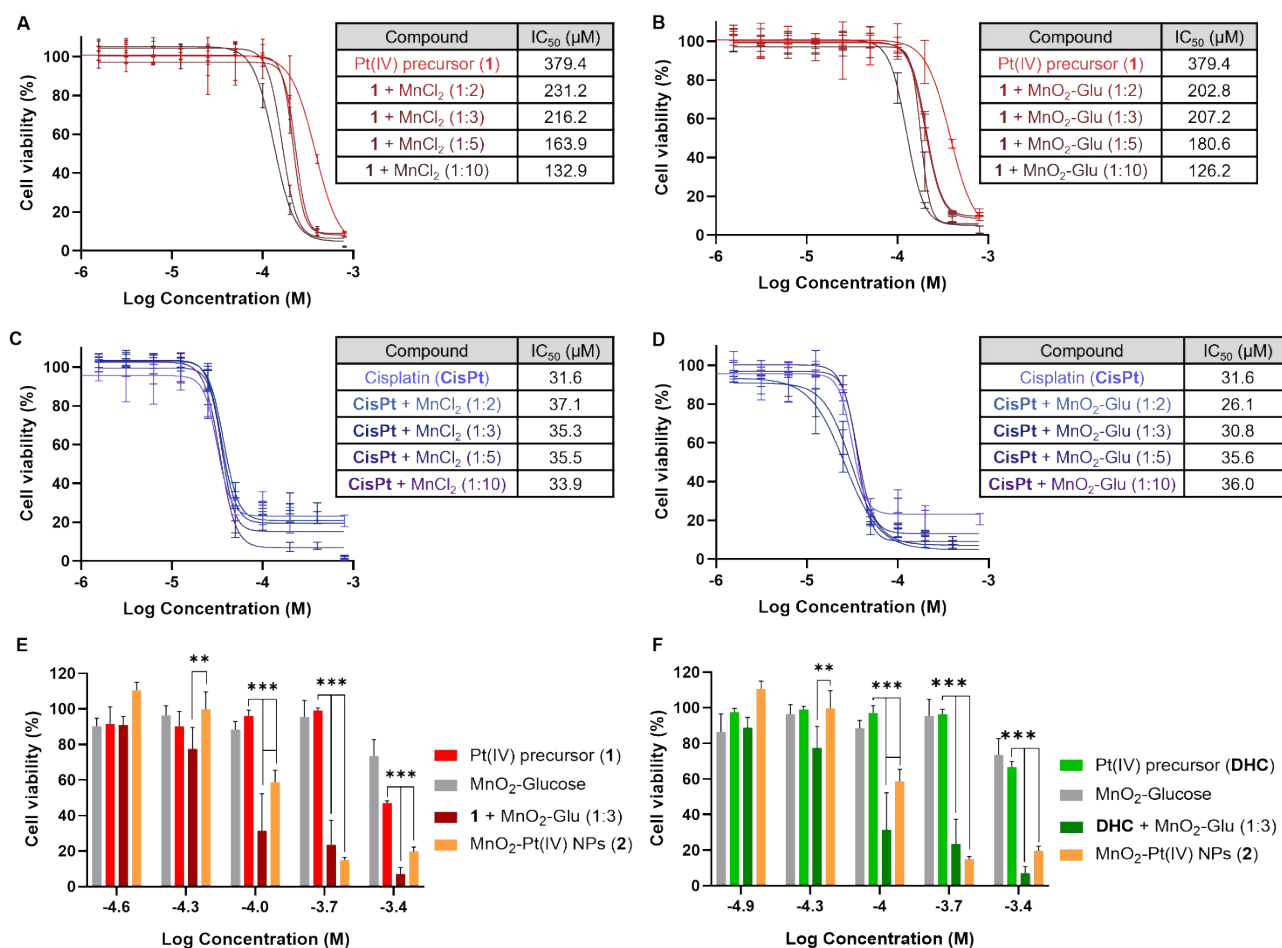

**Figure S7.** Cell viability studies employing 2D models of A549 cells after 48 h of treatment. Concentration refers to Pt concentration in all conditions, except for MnO<sub>2</sub>-Glu NPs and MnCl<sub>2</sub>, where Mn concentration is shown. Comparison of cell viability of Pt(IV) prodrug **1** after addition of **A**) MnCl<sub>2</sub> salts and **B**) MnO<sub>2</sub>-Glucose nanoparticles (Mn concentration equivalent to 2, 3, 5 and 10 times the Pt concentration) and corresponding calculated IC<sub>50</sub> values. Comparison of cell viability of cisplatin after addition of **A**) MnCl<sub>2</sub> salts and **B**) MnO<sub>2</sub>-Glucose nanoparticles (Mn concentration equivalent to 2, 3, 5 and 10 times the Pt concentration) and corresponding calculated IC<sub>50</sub> values. **E** and **F**) Comparison of cell viability of Pt(IV) prodrugs **1** and oxoplatin (DHC) after addition of MnO<sub>2</sub>-Glucose nanoparticles (Mn/Pt = 3). \*\*p < 0.0034, \*\*\*p < 0.001 (two-way ANOVA).

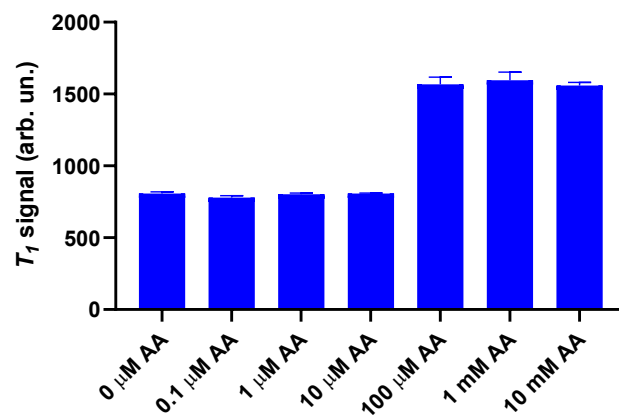

**Figure S8.** MR signals of MnO<sub>2</sub>-Pt(IV) NPs in the presence of different concentrations of AA (0-10 mM) at pH=7.4, at 3 T.

**Table S2.** ICP-MS results from the analysis of Pt and Mn content of DNA samples extracted from cell incubated in media or in the presence of the NPs.

|                      | DNA measure / ng | Pt / ppm   | Mn / ppm  |
|----------------------|------------------|------------|-----------|
| <b>Media control</b> | 168.0 ± 53.7     | <LOD       | 0.6 ± 0.2 |
| <b>NPs</b>           | 103.3 ± 38.5     | 12.4 ± 2.6 | 1.3 ± 0.7 |

### $T_1$ MR signal of MnO<sub>2</sub>-Pt with $\neq$ reducing agents

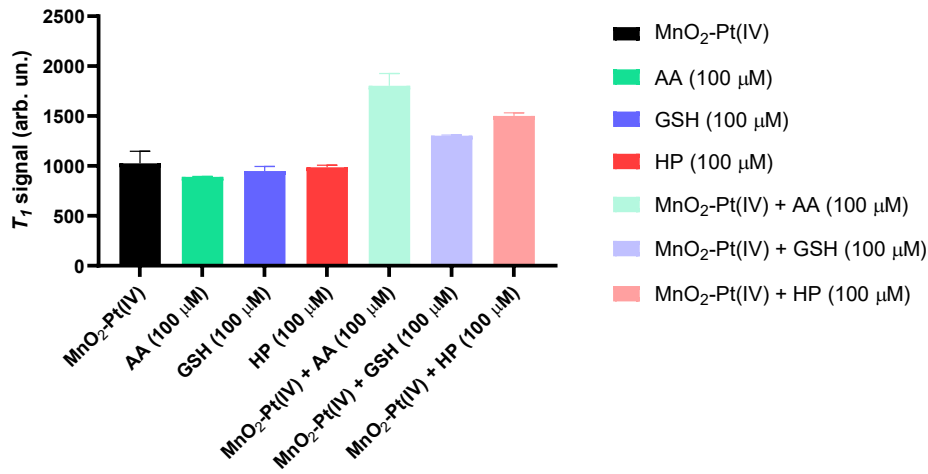

**Figure S9.** MR signals of MnO<sub>2</sub>-Pt(IV) NPs in the presence of 100  $\mu$ M of different reducing agents: ascorbic acid (AA), glutathione (GSH) and hydrogen peroxide (HP) at pH=7.4, at 3 T.

### Stability of MnO<sub>2</sub>-Pt(IV) NPs in murine plasma

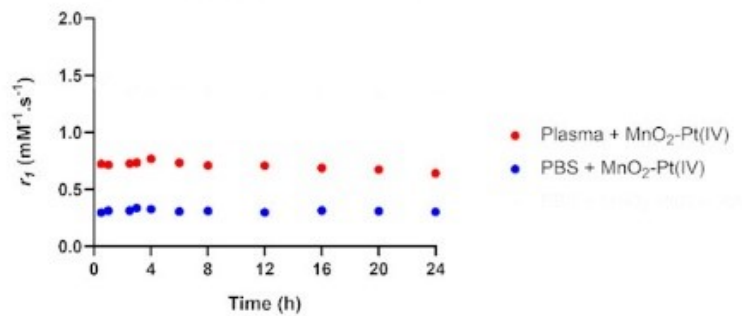

**Figure S10.** Relaxometry measurements of MnO<sub>2</sub>-Pt nanoparticles in PBS or murine plasma at different time points, at 9.4 T.

### Emission of 2 $\mu$ M BSA in PBS (pH 7.4) with MnO<sub>2</sub>-Pt NPs ( $\lambda_{ex}$ =295 nm)

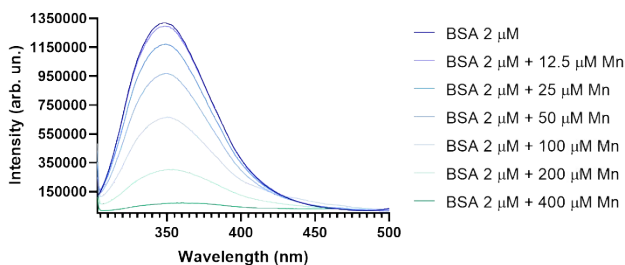

### Stern–Volmer plot of BSA fluorescence quenching by MnO<sub>2</sub>-Pt NPs

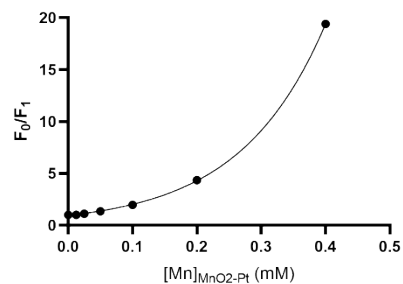

**Figure S11.** Left: Emission spectra of 2  $\mu$ M BSA in PBS (pH=7.4) with varying concentration of MnO<sub>2</sub>-Pt nanoparticles at  $\lambda_{ex}$ =295 nm. Right: Stern–Volmer plot relating [MnO<sub>2</sub>-Pt nanoparticles] added *versus*  $F_0/F_1$ , where  $F_0$  is the fluorescence intensity of BSA (2  $\mu$ M) in PBS (pH=7.4) without quenching agent and  $F_1$  is the fluorescence intensity of samples with MnO<sub>2</sub>-Pt NPs added, showing dynamic quenching, indicative of dynamic binding, of MnO<sub>2</sub>-Pt(IV) NPs to BSA.

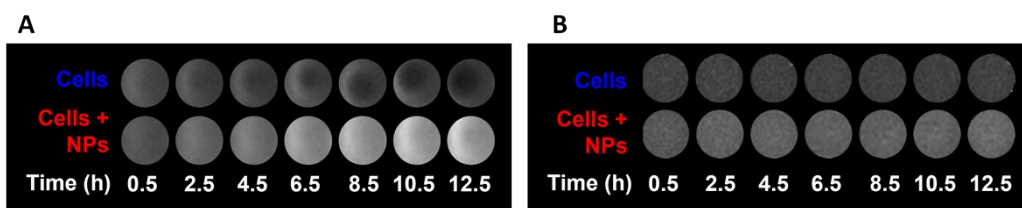

**Figure S12.** Representative MR phantom images of A) 2D and B) 3D A549 cells treated with MnO<sub>2</sub>-Pt NPs (637 μM and 500 μM of Mn, respectively) over time, at 3.0 T.

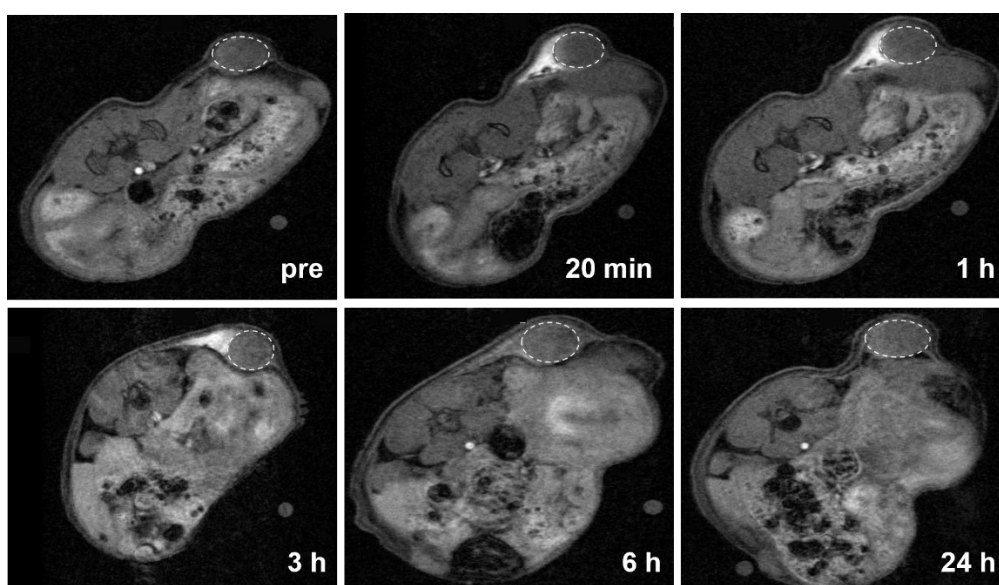

**Figure S13.** *T*<sub>1</sub>-weighted axial MR images of tumour-bearing Balb/c nude mice before (pre) and 20 min, 1 h, 3 h, 6 h and 24 h after intratumoral injection of MnCl<sub>2</sub>, acquired using a 9.4 T MR scanner. White circles highlight tumour sites.

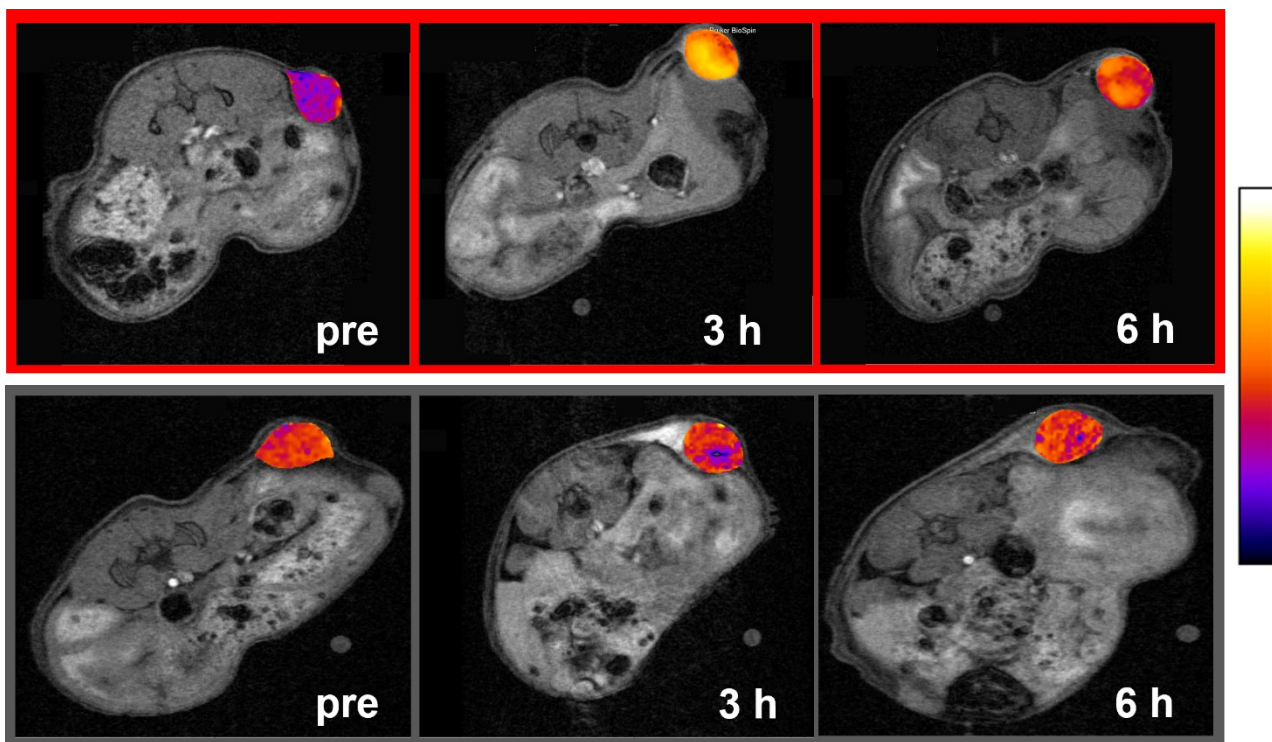

**Figure S14.**  $T_1$ -weighted axial MR images of tumour-bearing Balb/c nude mice before (pre), 3 h and 6 h after intratumoral injection of  $\text{MnO}_2$ -Pt(IV) NPs (above)  $\text{MnCl}_2$  (below), overlapped with  $T_1$  maps of tumours, acquired using a 9.4 T MR scanner.

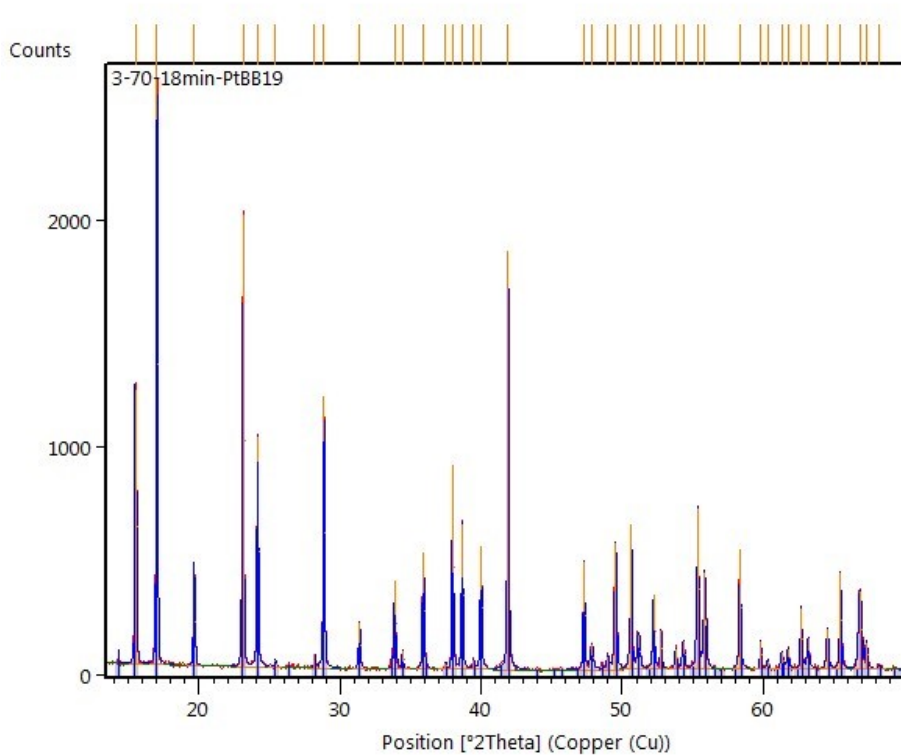

**Figure S15.** XRD spectrum of Pt(IV) prodrug oxoplatin (*cis, cis, trans*-Diamminedichlorodihydroxyplatinum(IV)).
